# Supplementary material for: Stabilizing effect of mélange buttressing on the Marine Ice Cliff Instability of the West Antarctic Ice Sheet
Source: Copernicus journal article supplement (doi:10.5194/tc-2021-238), 2021-08-12
Supplement: Supplementary file [file tc-2021-238-AC1-supplement.pdf]

# Anonymous Referee #1

## *General comments*

*This paper investigates the possible consequences of two main instabilities mechanisms (MISI and MICI) for the Amundsen region of the Antarctic Ice Sheet (AIS) using the Parallel Ice Sheet Model (PISM). The authors use a simple cliff-calving parameterization and a mélange buttressing model that were proposed and tested on idealized cases in their previous papers and apply them to real glacier cases in this paper. MICI is an important mechanism that could lead to large uncertainties in modeling the physics of the ice sheets. Recent theoretical and modeling studies (Ma et al., 2017, Bassis et al., 2017, Mercenier et al., 2018) have investigated and analyzed mechanisms for MICI. Applying a more physically based cliff-calving law on real glaciers setting is the timely step to makes an important contribution to the MICI hypothesis. However, I have several concerns described below that need to be addressed before publication. The impact and usefulness of the paper could be improved further if it were expanded to clarify some fundamental issues associated with constraining the idealized mélange buttressing parameterizations. Without observationally constrained models, the results would be over/under- estimating sea level contribution as other papers the authors mention in the manuscript.*

### *1. Constraining the idealized mélange buttressing parameterization*

*The authors of course acknowledge and raise this issue in the manuscript. However, the application of the mélange buttressing parameterization is still limited because the model parameters are not observationally constrained. For example, the authors choose  $u_{ex}=100$  km/a that falls between mélange flow speed (10-18 km/a) and iceberg drift velocity (3000-5500 km/a) but it's a quite large range (10~1000 km/a) and I think the authors arbitrarily choose this value (If I understand correctly). It seems that the results heavily depend on this  $u_{ex}$  value because it determines the upper bound of the calving rate ( $C_{max}$ ) so constraining  $u_{ex}$  based on observations (e.g., observational calving rate) is key to applying the parameterization to real glacier cases. Please elaborate on how this  $u_{ex}$  is chosen and I suggest some sensitivity tests if needed.*

*Also, please elaborate on how other parameters for the cliff-calving law and mélange model are chosen or constrained with observations.*

**Reply:** The main parameter in the cliff calving parametrisation,  $C_0$ , is poorly constrained because it depends on the timescale of shear failure and there are no experimental or observational studies for ice. However, in the mélange-buttressed case  $C_{max}$  plays a much larger role in determining the calving rate, so the uncertainty in  $C_0$  does not matter very much (see Schlemm&Levermann 2021). In the mélange buttressing parametrisation,  $\mu_0$  is the coefficient of internal friction of the mélange and ranges from about 0.1 to larger than 1. Following Amundson and Burton (2018), we chose  $\mu_0=0.3$ .  $b_0$  and  $b_1$  follow from linearising an exponential relation from Amundson and Burton (2018) (see Schlemm&Levermann 2021). Details have been added to the manuscript.

In order to deal with the uncertainty in the mélange exit velocity  $u_{ex}$ , we performed additionally a range of adaptive experiments with different  $u_{ex}$  values: 10 km/a (CCA10), 50 km/a (CCA50), 100 km/a as included in the original manuscript (CCA100), 200 km/a (CCA200), and 1000 km/a

(CCA1000). The resulting  $C_{max}$  for the initial ice geometry lie between 1.5 km/a for CCA10 and 150 km/a for CCA1000. Consequently CCA10 shows very little cliff calving and only little more ice retreat than FLK or BMT. The  $C_{max}$  of CCA1000 is initially so much larger than the actual cliff calving rate that there is effectively no mélange buttressing. As the calving front retreats,  $C_{max}$  decreases as in the CCA experiment included in the original manuscript. In contrast to the CC# experiments, where the upper bound  $C_{max}$  was chosen adhoc, these experiments correlate an in principle observable parameter, the mélange exit velocity, to sea level rise. This does not actually constrain the  $u_{ex}$  value but gives a better understanding of its importance for the speed of MICI.

Amundson, J. M. and Burton, J. C.: Quasi-Static Granular Flow of Ice Mélange, *J. Geophys. Res. Earth*, 123, 2243–2257, <https://doi.org/10.1029/2018JF004685>, 2018.

Schlemm, T. and Levermann, A.: A simple parametrization of mélange buttressing for calving glaciers, *The Cryosphere*, 15, 531–545, <https://doi.org/10.5194/tc-15-531-2021>, 2021.

## 2. Model description

*I think the methods section is a little scant on details on model description. See below for more details.*

**Reply:** Details and references were added.

*P2L10: “This is referred to as Marine Ice Cliff Instability (MICI)”*: add references.

**Reply:** Done.

*P4L6: “... at a horizontal resolution at 4 km”. I think it would be beneficial if the authors could state the spatial and temporal resolution in a few sentences to make sure that results are numerically converged (i.e., independent of resolution) or the impact of resolution on the results.*

**Reply:** Done.

*P4L12: “The till friction angle is parameterized with bed elevation”*

*How is it parameterized? Please include details and references.*

**Reply:** Reference was added.

*P6L4: “The ice sheet was spun up into thermal equilibrium with fixed bed and ice geometry”*

*Please include details on how the model is initialized, for example, how long was the model spun up? What data (SMB, temperature) were used for this procedure? Also, include references if there are any.*

**Reply:** Length of the spinup was added. Boundary conditions (SMB, etc.) were previously described in section 2.1 and were moved into a separate section for more clarity.

P6L9: “REF: a reference simulation with current day atmosphere and ocean conditions held constant”

What are the current day conditions for the atmosphere and ocean? Include details and references.

**Reply:** Reference to the boundary conditions section was added.

P7L1: “BMT: the ‘basal melt experiment...200 m/a”

Why 200 m/a? any reference? Consider moving sentences from P8L18-L20 to this section.

What about the ice front? I think there is no calving in this experiment. Although it is explained later in the Results, please add how the ice front is dealt with (fixed or move) for this experiment.

**Reply:** Description from P8L18-L20 was moved here. The ice front is free to evolve.

P7L3: “FLK: the ‘floatkill’ ... removed”

Again, please add how the ice front is dealt with (fixed or move) for this experiment.

**Reply:** Done.

P8L2: “the three cliff calving experiments with small  $C_{max}$ ”.

Specify “small  $C_{max}$ ”. 2, 5, 10 km/a for  $C_{max}$ ?

**Reply:** Done.

P8L1-3: “The ‘floatkill’ -parameterization... with  $C_{max}=20$  km/a”

Where are the results of the extended simulations?

**Reply:** The extended simulations are used for the flowline analysis.

P8L31: “...reached the boundary of the inner WAIS region where cliff calving and the ‘floatkill’ parameterization are applied” -> floatkill parameterization are “not” applied.

**Reply:** This was corrected.

P10L2: “see fig3c” -> Figure 6?

**Reply:** Reference is now to a table, in which  $C_{max}$  values are given.

P10L14: “This results in a slightly lower overall calving discharge”

What is that compared to?  $C_{max}=2$  m/a without floatkill parameterization?

*Does this issue with partially filled cells only show up when  $C_{max}=2$  m/a? or also with  $C_{max}=5$  m/a? Does this issue depend on the resolution of the domain? Please elaborate.*

**Reply:** Yes, this issue depends on the resolution of the domain. Previous unpublished sensitivity tests in a channel setup showed that for a resolution of  $x$  km, this problem occurs for calving rates smaller than  $x$  km/a. This has been added to the manuscript.

*P11L7: "...is shown in fig 3c." -> Fig. 6*

**Reply:** Reference is now to a table, in which  $C_{max}$  values are given.

*P13L7: "...with the FLK experiment being the slowest, arriving there after 150a"*

*I don't see the results with extended time in the manuscript. Consider putting the results in the manuscript or appendix, or put "not shown here" in the text.*

**Reply:** "not shown here" was added in the manuscript.

*P16L7: "we use an estimate of  $u_{ex}=100$  km/a. However, smaller or larger values would also be consistent with observations"*

*Why do you choose this value? Is the model calibrated against observation with this value? Please clarify what's consistent with observations. Have you done the sensitivity tests with  $u_{ex}$  values?*

**Reply:** New adaptive experiments were performed with a large range of values for  $u_{ex}$  and added to the manuscript.

*P16L15: "4.1.2 Melange build-up can stop MICI under winter conditions"*

*The title of this section could be misleading since the results show that mélangé can stop MICI only if the winter condition ( $u_{ex}=0$ ) lasts for several years, which is unlikely in real climate conditions.*

**Reply:** The title was corrected to "Winter freezing of mélangé is not sufficient to stop MICI".

*P18L6: "This seasonality can be modelled with a time-dependent ..."*

*Does this experiment include melting/freezing of mélangé? How are the results affected with melting/freezing of mélangé?*

**Reply:** This model is described in more detail in Schlemm and Levermann (2021). It can describe melting of mélangé, but no freezing. Therefore freezing is modelled by assuming a vanishing exit velocity. This was added to the manuscript.

*P18L26: "The mélangé parameterization assumes a constant calving rate..."*

*Do you mean "the upper bound on calving rates ( $C_{max}$ )?"*

**Reply:** The mélange parameterization assumes a constant calving rate along the entire length of the calving front. This has been clarified in the manuscript.

*P20L2: “The processes by which ice shelves fracture... in an ice sheet model”*

*Add references.*

**Reply:** Done.

*P22L14: “...but it could provide enough buttressing to enable ice shelf regrowth, which would then stop further MICI progress.”*

*Is the ice shelf regrowth shown in model results or just from observations of Jakobshavn glacier?*

**Reply:** This is from observations of Jakobshavn. PISM allows shelves to regrow as soon as floatkill is turned off.

*Figure 4a: How is “calving discharge” calculated? Is this “(calving rate) x (area)” or ice discharge, that is “(velocity) X (area)”?* If “calving discharge” is (calving rate) x (area), how is that calculated from the floatkill experiment which does not have calving? If calving discharge is ice discharge, the term “calving discharge” could be confusing.

**Reply:** PISM uses a subgrid scheme at the ice margin where cells are partially filled with ice. In each time step, calving removes some of the ice in such a cell, whereas floatkill removes completely filled cell if they are floating. This removed ice volume is summed up in the calving discharge variable. This has been added to the manuscript.

*Figure 4b: The calving amplification value for C\_max 20 km/a experiment seems larger than 6 but it's cut off. Please consider including the full extent if possible. Also, I am wondering why it suddenly increases toward the end of the simulation. From Figure 4a, the overall calving discharge for C\_max 20 km/a looks highest near t=60a and decreases towards the end of the simulation.*

**Reply:** Plot ranges were adapted, so that all curves are visible. Since the new CCA1000 experiment has much higher values than the other experiments, an inset was used to show its whole range. The calving amplification of the CC20 and the CCA1000 experiments increases toward the end of the simulation time because parts of the grounding line have reached the margin of the inner WAIS region, beyond which cliff calving and the 'floatkill' mechanism are not applied. This has been added to the manuscript.

*Figure 5: Why do authors prohibit calving for the shaded area? Is it because of the bed topography>0 for that area? Include 0 m contour of bed topography since it's hard to see in the grey scale.*

**Reply:** The implementation of cliff calving in PISM allows no calving if the bed topography>0. The 0 m contour was added to the plot. However, if calving is allowed on all ice margins, ice

retreat starts all over Antarctica, for example on the Antarctic Peninsula. So calving is prohibited at all ice margins except in the Amundsen region. Because it is difficult to exclude only the margins, this prohibited region goes a little bit inland as a safety margin.
